# Supplementary material for: Somatotropic Axis Dysfunction in Non-Alcoholic Fatty Liver Disease: Beneficial Hepatic and Systemic Effects of Hormone Supplementation
Source: MDPI journal article supplement (doi:10.3390/ijms19051339), 2018-05-02
Supplement: s1 [file s1]

## Supplementary Materials:

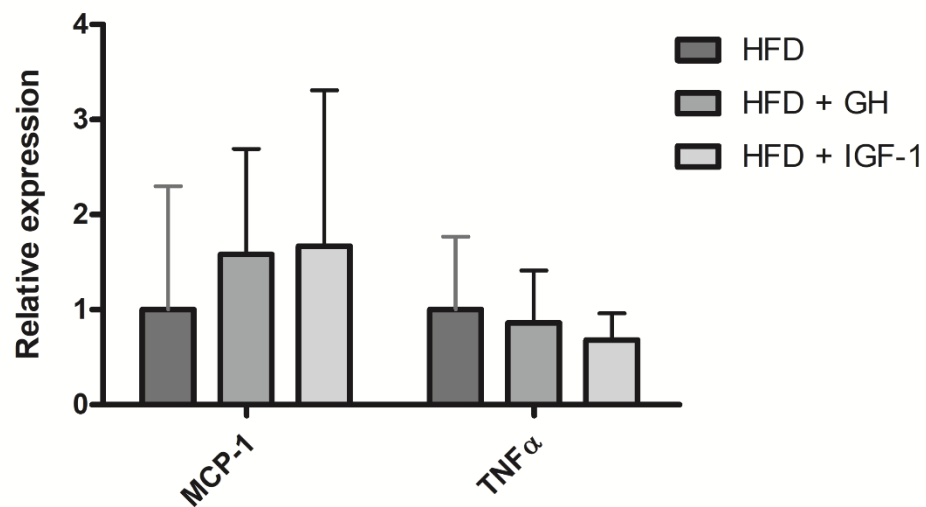

**Supplementary figure 1.** No significant difference was observed in liver inflammatory mediator expression (monocyte chemotactic protein 1, MCP-1; tumor necrosis factor  $\alpha$ , TNF $\alpha$ )

**Supplementary Table 1.** Summary of qPCR primers included in the study

| Item Data  | Gene                                                               | Species      | Forward (5'-->3')              | Reverse (5'-->3')         | NCBI Access N°                      | PCR product (bp) |
|------------|--------------------------------------------------------------------|--------------|--------------------------------|---------------------------|-------------------------------------|------------------|
| m SREBP-1c | sterol regulatory element binding transcription factor 1 (SREBF1c) | Mus Musculus | GGA GCC ATG GAT TGC ACA TT     | GGC CCG GGA AGT CAC TGT   | XM_006532716.1                      | 70               |
| m Acaca    | acetyl-Coenzyme A carboxylase alpha (Acaca)                        | Mus Musculus | TGACAGACTGATCGCAGAGAAAAG       | TGGAGAGCCCCACACACA        | NM_133360.2<br>(transcript variant) | 75               |
| m Fasn     | fatty acid synthase (Fasn)                                         | Mus Musculus | GCTGCGGAAACTTCAGGAAAT          | AGAGACGTGTCACCTCTGGACTT   | NM_007988.3                         | 84               |
| m Scd1     | stearoyl-Coenzyme A desaturase 1 (Scd1)                            | Mus Musculus | CCGGAGACCCCTTAGATCGA           | TAGCCTGTAAAAGATTCTGCAAACC | NM_009127.4                         | 89               |
| TNF-A      | tumor necrosis factor (Tnf)                                        | Mus Musculus | CCC TCA CAC TCA GAT CAT CTT CT | GCT ACG ACG TGG GCT ACA G | NM_013693.3                         | 61               |
| MCP-1      | chemokine (C-C motif) ligand 2 (Ccl2)                              | Mus Musculus | TTAAAAACCTGGATCGGAACCAA        | GCATTAGCTTCAGATTACGGGT    | NM_011333.3                         | 121              |
